# Supplementary material for: Imaging Features of Epithelial Lacrimal Gland Tumors: A Retrospective MRI Analysis of Benign and Malignant Lesions
Source: Research Square preprint supplement (doi:10.21203/rs.3.rs-5694387/v1), 2024-12-30
Supplement: Supplementary file 1 [file 4794845a7bc069feabe2f306.xlsx]

## Sheet: 年龄
report
age
pathological type	mean	N	SD
Benign pleomorphic adenoma	45.04	24	16.714
Adenoid cystic carcinoma	55.2	10	16.308
other nalignant epithelial tumor	62.88	8	5.515
total	50.86	42	16.518
report
age
type	mean	N	SD	range	minimun	maximun
beningn	45.0417	24	16.7136	55	20	75
malignant	58.6111	18	12.9893	49	23	72
total	50.8571	42	16.5184	55	20	75

## Sheet: 病理分型性别部位
case summary
	case
	included		excluded		total
	N	percentage	N	pecent	N	pecent
agw,pathological classification,gender,location	42	1	0	0	42	1
report
age
pathological type			mean	N	SD
benign pleomorphic adenoma	male	left	43.4	5	19.2042
		right	38.3333	3	19.7315
		total	41.5	8	18.1344
	female	left	45	7	17.9629
		right	48.2222	9	15.7938
		total	46.8125	16	16.2736
	total	left	44.3333	12	17.6292
		right	45.75	12	16.4986
		total	45.0417	24	16.7136
adenoid cystic carcinoma	male	left	62.5	2	13.435
		right	49.5	2	13.435
		total	56	4	13.2916
	female	left	54	3	26.9629
		right	55.3333	3	14.1892
		total	54.6667	6	19.2838
	total	left	57.4	5	20.7437
		right	53	5	12.49
		total	55.2	10	16.3081
other malignant epithelial tumor	male	left	63	4	3.55903
		right	64.5	2	10.6066
		total	63.5	6	5.54076
	female	left	56	1
		right	66	1
		total	61	2	7.07107
	total	left	61.6	5	4.39318
		right	65	3	7.54983
		total	62.875	8	5.51459
total	male	left	54	11	16.5045
		right	49	7	17.767
		total	52.0556	18	16.6715
	female	left	48.4545	11	19.0335
		right	51.2308	13	15.1336
		total	49.9583	24	16.7032
	total	left	51.2273	22	17.6147
		right	50.45	20	15.6692
		total	50.8571	42	16.5184

## Sheet: 卡方检验
crosstabs
			type		total
			benign	malignant													Table 1 Comparison table of different pathological types of lacrimal gland epithelial tumors
location	left	counts	12a	10a	22					featires		benign group（n=24）	malignant group（n=18）	P			type	case	age	malecase number
		site%	0.545455	0.454545	1					location	left	12	10	0.721			Benign pleomorphic adenoma	24	45.04±16.71	8（33.33%）
	right	counts	12a	8a	20						right	12	8				Adenoid cystic carcinoma	10	55.20±16.31	5（50.00%）
		site%	0.6	0.4	1					size（cm）	≤3	21	5	0.001			Other malignant epithelial tumors	8	62.88±5.52	6（75.00%）
total		counts	24	18	42						＞3	3	13
		site%	0.571429	0.428571	1					morphology	regular	17	6	0.016
Each subscript letter represents a subset of the benign and malignant categories whose column proportions are not significantly different from each other at the .05 level.											irregular	7	12
chi-square test										boundary	clear	22	10	0.007
	value	df	progressive Sig.(bilateral)	Precise Sig. (Two-Sided)	Precise Sig. (one-sided)						unclear	2	8
Pearson chi square	.127a	1	0.721277							bone destruction	yes	1	9	0.001
continuous correction b	0.00198864	1	0.964431								no	23	9
likelihood ratio	0.127408	1	0.721135							cystic change	yes	10	9	0.591
Fisher's precise test				0.76379	0.482553						no	14	9
Linear and linear combinations	0.124242	1	0.724478							wedge	yes	0	9	0.001
N in a valid case	42										no	24	9
a. 0 cells (0.0%) have an expected count of less than 5. The minimum expected count is 8.57.
b. Calculations for 2x2 tables only
cross tab
			typw		total					image features		benign group（n=24）	malignant group（n=18）	P
			benign	malignant						T1WIsignal	low	15	4	0.034
size	＞3cm	count	3a	13b	16						iso	6	9
		size%	0.1875	0.8125	1						mixed	3	5
	＜3cm	count	21a	5b	26					T1WIuniformity	uniform	14	7	0.212
		size%	0.807692	0.192308	1						non uniform	10	11
total		count	24	18	42					T2WI	iso-high	14	17	0.008
		size%	0.571429	0.428571	1						high	10	1
Each subscript letter represents a subset of the benign and malignant categories whose column proportions are not significantly different from each other at the .05 level.										T2WIuniformity	uniform	2	4	0.203
chi-square											non uniform	22	14
	值	df	Progressive Sig. (bilateral)	Precise Sig. (Two-Sided)	Precise Sig. (one-sided)					enhancement	uniform	1	0	0.381
Pearson chi square	15.556a	1	8.00763e-05								non uniform	23	18
continuous correction b	13.1271	1	0.000291054
likelihood ratio	16.4651	1	4.95539e-05
Fisher's precise test				0.000113756	0.000109339
Linear and linear combinations	15.1861	1	9.7418e-05
N in a valid case	42
a. 0 cells (0.0%) have an expected count of less than 5. The minimum expected count is 6.86.少于 5。最小期望计数为 6.86。
b. Calculations for 2x2 tables only
crosstab
			type		total
			benign	malignant
morphology	regular	counts	17a	6b	23
		patternin%	0.73913	0.26087	1
	irregular	counts	7a	12b	19
		patternin%	0.368421	0.631579	1
total		counts	24	18	42
		patternin%	0.571429	0.428571	1
Each subscript letter represents a subset of the benign and malignant categories whose column proportions are not significantly different from each other at the .05 level.
chi-square
	value	df	progressive Sig.(bilateral)	Precise Sig. (Two-Sided)	Precise Sig. (one-sided)
Pearson chi square	5.839a	1	0.0156776
Continuous correction b	4.42305	1	0.0354565
Likelihood ratio	5.95373	1	0.0146861
Fisher's precise test				0.0276959	0.0172734
inear and linear combinations	5.69966	1	0.0169682
N in a valid case	42
a. 0 cells (0.0%) have an expected count of less than 5. The minimum expected count is 8.14.
b. Calculations for 2x2 tables only
crosstab
			type		total
			benign	malignant
boundary	clear	count	22a	10b	32
		% in Boundaries	0.6875	0.3125	1
	unclear	count	2a	8b	10
		% in Boundaries	0.2	0.8	1
total		count	24	18	42
		% in Boundaries	0.571429	0.428571	1
Each subscript letter represents a subset of the benign and malignant categories whose column proportions are not significantly different from each other at the .05 level.
chi-square
	value	df	Progressive Sig. (bilateral)	Precise Sig. (Two-Sided)	Precise Sig. (one-sided)
Pearson chi square	7.394a	1	0.00654509
continuous correction b	5.53711	1	0.0186173
likelihood ratio	7.6067	1	0.00581517
Fisher's precise test				0.0103634	0.00903049
Linear and linear combinations	7.21771	1	0.00721878
N in a valid case	42
a. 1 cell (25.0%) has an expected count of less than 5. The minimum expected count is 4.29.
b. Calculations for 2x2 tables only
crosstab
			type		total
			benign	malignant
Cystic changes	yes	count	10a	9a	19
		Cystic changes %	0.526316	0.473684	1
	no	count	14a	9a	23
		Cystic changes %	0.608696	0.391304	1
total		count	24	18	42
		Cystic changes %	0.571429	0.428571	1
Each subscript letter represents a subset of the benign and malignant categories whose column proportions are not significantly different from each other at the .05 level.
chi-square
	value	df	Progressive Sig. (bilateral)	Precise Sig. (Two-Sided)	Precise Sig. (one-sided)
Pearson chi square	.288a	1	0.591293
continuous correction b	0.0500572	1	0.822964
likelihood ratio	0.288258	1	0.591339
Fisher's precise test				0.755523	0.411153
Linear and linear combinations	0.281465	1	0.595743
N in a valid case	42
a. 0 cells (0.0%) have an expected count of less than 5. The minimum expected count is 8.14.
b. Calculations for 2x2 tables only
crosstab
			type		total
			benign	malignant
bone destruction	yes	count	1a	9b	10
		bone destruction %	0.1	0.9	1
	no	count	23a	9b	32
		bone destruction %	0.71875	0.28125	1
total		count	24	18	42
		bone destruction %	0.571429	0.428571	1
Each subscript letter represents a subset of the benign and malignant categories whose column proportions are not significantly different from each other at the .05 level.
chi-sqaue
	value	df	Progressive Sig. (bilateral)	Precise Sig. (Two-Sided)	Precise Sig. (one-sided)
Pearson chi square	11.911a	1	0.000558053
continuous correction b	9.51836	1	0.00203426
likelihood ratio	12.8383	1	0.000339596
Fisher's precise test				0.000822756	0.000822756
Linear and linear combinations	11.6273	1	0.000649893
N in a valid case	42
a. 1 cell (25.0%) has an expected count of less than 5. The minimum expected count is 4.29.
b. Calculations for 2x2 tables only
crosstab
			type		total
			benign	malignant
wedge	yes	count	0a	9b	9
		wedgesign %	0	1	1
	no	count	24a	9b	33
		wedgesign %	0.727273	0.272727	1
total		count	24	18	42
		wedgesign %	0.571429	0.428571	1
Each subscript letter represents a subset of the benign and malignant categories whose column proportions are not significantly different from each other at the .05 level.
chi-square
	value	df	Progressive Sig. (bilateral)	Precise Sig. (Two-Sided)	Precise Sig. (one-sided)
Pearson chi square	15.273a	1	9.30503e-05
continuous correction b	12.4474	1	0.000418576
likelihood ratio	18.6914	1	1.53673e-05
Fisher's precise test				0.00010904	0.00010904
Linear and linear combinations	14.9091	1	0.000112818
N in a valid case	42
a. 1 cell (25.0%) has an expected count of less than 5. The minimum expected count is 3.86.。
b. Calculations for 2x2 tables only
crosstab
			type		total
			benign	malignant
T1signal	low	count	15a	4b	19
		T1signal %	0.789474	0.210526	1
	iso	count	6a	9a	15
		T1signal %	0.4	0.6	1
	mixed	count	3a	5a	8
		T1signal %	0.375	0.625	1
total		count	24	18	42
		T1signal%	0.571429	0.428571	1
Each subscript letter represents a subset of the benign and malignant categories whose column proportions are not significantly different from each other at the .05 level.
chi-square
	value	df	Progressive Sig. (bilateral)
Pearson chi square	6.749a	2	0.034235
likelihood ratio	7.0321	2	0.0297166
Linear and linear combinations	5.39651	1	0.020177
N in a valid case	42
a. 2 cells (33.3%) have an expected count of less than 5. The minimum expected count is 3.43.
crosstabs
			type		total
			benign	malignant
T1uniformity	uniform	total	14a	7a	21
		T1uniformity %	0.666667	0.333333	1
	non-uniform	total	10a	11a	21
		T1uniformity %	0.47619	0.52381	1
total		total	24	18	42
		T1uniformity %	0.571429	0.428571	1
Each subscript letter represents a subset of the benign and malignant categories whose column proportions are not significantly different from each other at the .05 level.
chi-square test
	value	df	Progressive Sig. (bilateral)	Precise Sig. (Two-Sided)	Precise Sig. (one-sided)
Pearson chi square	1.556a	1	0.212317
continuous correction b	0.875	1	0.349575
likelihood ratio	1.56614	1	0.210768
Fisher's precise test				0.349887	0.174943
Linear and linear combinations	1.51852	1	0.217844
N in a valid case	42
a. 0 cells (0.0%) have an expected count of less than 5. The minimum expected count is 9.00.
b. Calculations for 2x2 tables only
crosstab
			type		total
			benign	malignant
T2signal	isohigh	total	14a	17b	31
		% in T2 Signal	0.451613	0.548387	1
	high	total	10a	1b	11
		% in T2 Signal	0.909091	0.0909091	1
total		total	24	18	42
		% in T2 Signal	0.571429	0.428571	1
Each subscript letter represents a subset of the benign and malignant categories whose column proportions are not significantly different from each other at the .05 level.
chi-square test
	vale	df	Progressive Sig. (bilateral)	Precise Sig. (Two-Sided)	Precise Sig. (Two-Sided)
Pearson chi square	6.938a	1	0.00843638
continuous correction b	5.19611	1	0.0226374
likelihood ratio	7.97794	1	0.00473508
Fisher's precise test				0.012218	0.00883033
Linear and linear combinations	6.77322	1	0.00925359
N in a valid case	42
a. 1 cell (25.0%) has an expected count of less than 5. The minimum expected count is 4.71.
b. Calculations for 2x2 tables only
T2 Uniformity* Benign and Malignant Cross-tabulation							chi square
			type		total			value	df	Progressive Sig. (bilateral)	Precise Sig. (Two-Sided)	Precise Sig. (one-sided)
			benign	malignant			Pearson chi square	1.620a	1	0.20304
t2 uniformity	uniform	total	2a	4a	6		continuous correction b	0.684606	1	0.408005
		T2 uniformity %	0.333333	0.666667	1		likelihood ratio	1.61222	1	0.20418
	non-iniform	total	22a	14a	36		Fisher's precise test				0.375239	0.203736
		tzT2 uniformity %	0.611111	0.388889	1		Linear and linear combinations	1.58179	1	0.208503
total		total	24	18	42		N in a valid case	42
		T2 uniformity %	0.571429	0.428571	1		a. 2 cells (50.0%) have an expected count of less than 5. The minimum expected count is 2.57.
Each subscript letter represents a subset of the benign and malignant categories whose column proportions are not significantly different from each other at the .05 level.							b. Calculations for 2x2 tables only
crosstan
			type		total
			benign	malignant
contrast method	uniform	total	1a	0a	1
		contrast method%	1	0	1
	non-iniform	total	23a	18a	41
		contrast method%	0.560976	0.439024	1
total		total	24	18	42
		contrast method%	0.571429	0.428571	1
Each subscript letter represents a subset of the benign and malignant categories whose column proportions are not significantly different from each other at the .05 level.
chi-square
	value	df	Progressive Sig. (bilateral)	Precise Sig. (Two-Sided)	Precise Sig. (one-sided)
Pearson chi square	.768a	1	0.380746
continuous correction b	0	1	1
likelihood ratio	1.13749	1	0.286184
Fisher's precise test				1	0.571429
Linear and linear combinations	0.75	1	0.386476
N in a valid case	42
a. 2 cells (50.0%) have an expected count of less than 5. The minimum expected count is .43.
b. calculation for 2*2 table only
